# Supplementary material
Source: Springer Nature journal article supplement (https://www.springermedizin.de/resource/supplementary/12889_2008_1258_MOESM2_ESM.pdf/9502800)

### MEN

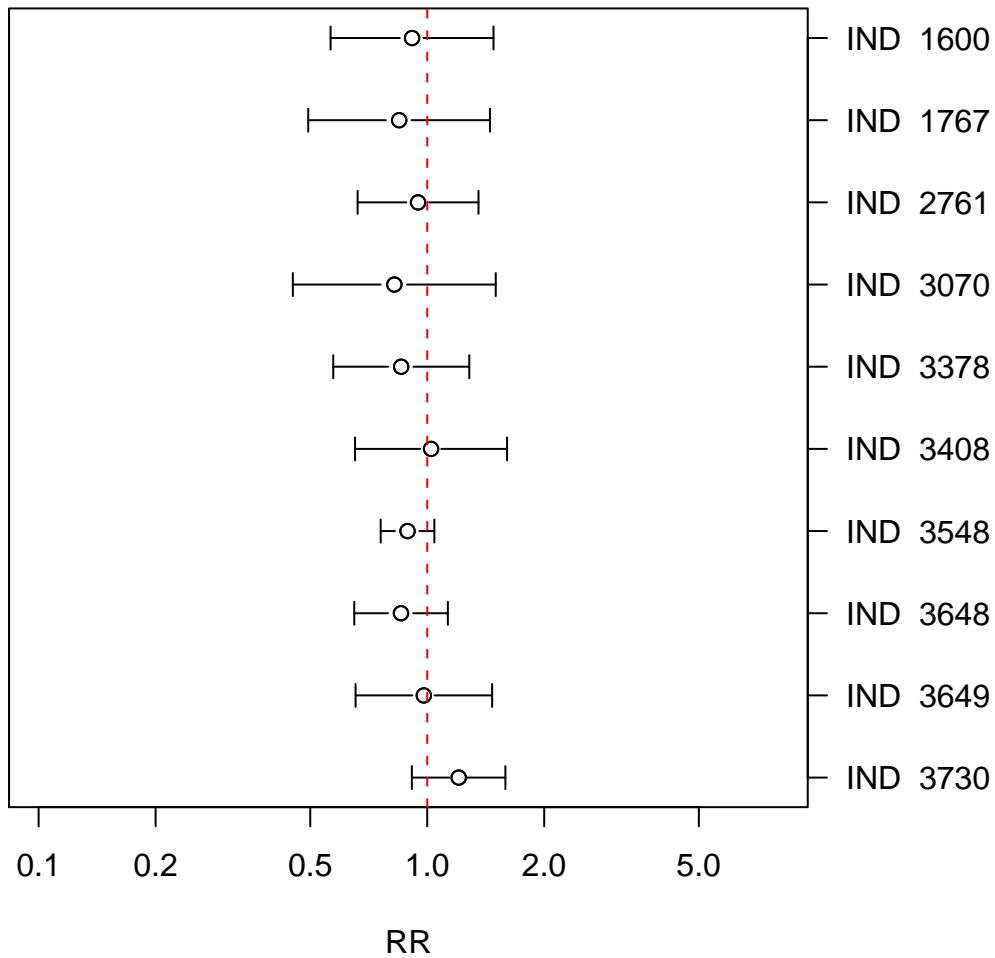

### WOMEN

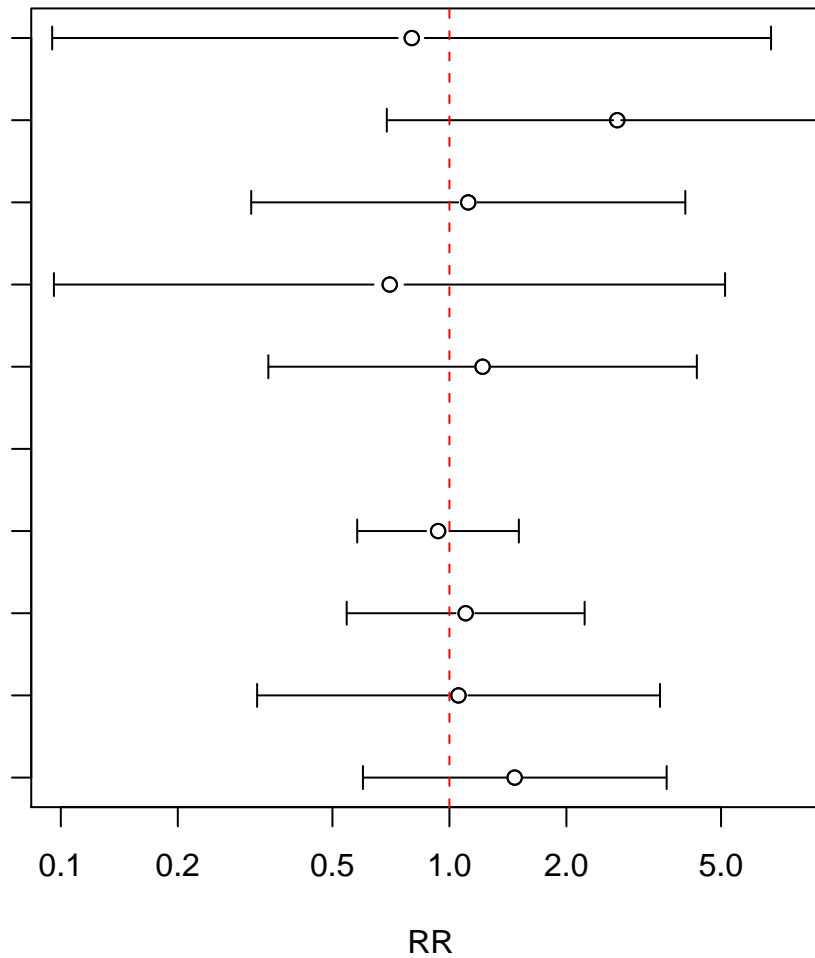

Supplement: MOESM2 [file 9502800]
